# Supplementary material
Source: Elsevier journal article supplement (https://www.sciencedirect.com/science/article/pii/S1135755X16000087)
Supplement: mmc1 [file S1135755X16000087:mmc1.pdf]

## CYBERBULLYING

EN ESTE APARTADO TE PREGUNTAMOS SOBRE TUS POSIBLES EXPERIENCIAS RELACIONADAS CON CYBERBULLYING EN TU ENTORNO (CENTRO ESCOLAR, AMIGOS, CONOCIDOS), COMO VICTIMA Y/O AGRESOR. TUS RESPUESTAS SERÁN CONFIDENCIALES.

¿Has vivido alguna de las siguientes situaciones en Internet o con el teléfono móvil en los últimos dos meses? (Por favor, señala para cada ítem la respuesta que mejor te venga)

|                                                                                                                                   | No                       | Sí, una o dos veces      | Sí, una o dos veces al mes | Sí, alrededor de una vez a la semana | Sí, más de una vez a la semana |
|-----------------------------------------------------------------------------------------------------------------------------------|--------------------------|--------------------------|----------------------------|--------------------------------------|--------------------------------|
| 1. Alguien me ha dicho palabras malsonantes o me ha insultado usando el email o SMS.                                              | <input type="checkbox"/> | <input type="checkbox"/> | <input type="checkbox"/>   | <input type="checkbox"/>             | <input type="checkbox"/>       |
| 2. Alguien ha dicho a otros palabras malsonantes sobre mí usando internet o SMS.                                                  | <input type="checkbox"/> | <input type="checkbox"/> | <input type="checkbox"/>   | <input type="checkbox"/>             | <input type="checkbox"/>       |
| 3. Alguien me ha amenazado a través de mensajes en internet o SMS.                                                                | <input type="checkbox"/> | <input type="checkbox"/> | <input type="checkbox"/>   | <input type="checkbox"/>             | <input type="checkbox"/>       |
| 4. Alguien ha pirateado mi cuenta de correo y ha sacado mi información personal. (ejemplo: A través de email o red social)        | <input type="checkbox"/> | <input type="checkbox"/> | <input type="checkbox"/>   | <input type="checkbox"/>             | <input type="checkbox"/>       |
| 5. Alguien ha pirateado mi cuenta y se ha hecho pasar por mí (a través de mensajería instantánea o cuentas en las redes sociales) | <input type="checkbox"/> | <input type="checkbox"/> | <input type="checkbox"/>   | <input type="checkbox"/>             | <input type="checkbox"/>       |
| 6. Alguien ha creado una cuenta falsa para hacerse pasar por mí. (Facebook o MSN)                                                 | <input type="checkbox"/> | <input type="checkbox"/> | <input type="checkbox"/>   | <input type="checkbox"/>             | <input type="checkbox"/>       |
| 7. Alguien ha colgado información personal sobre mí en internet.                                                                  | <input type="checkbox"/> | <input type="checkbox"/> | <input type="checkbox"/>   | <input type="checkbox"/>             | <input type="checkbox"/>       |
| 8. Alguien ha colgado videos o fotos comprometidas mías en internet.                                                              | <input type="checkbox"/> | <input type="checkbox"/> | <input type="checkbox"/>   | <input type="checkbox"/>             | <input type="checkbox"/>       |
| 9. Alguien ha retocado fotos mías que yo había colgado en internet.                                                               | <input type="checkbox"/> | <input type="checkbox"/> | <input type="checkbox"/>   | <input type="checkbox"/>             | <input type="checkbox"/>       |
| 10. He sido excluido o ignorado de una red social o de chat.                                                                      | <input type="checkbox"/> | <input type="checkbox"/> | <input type="checkbox"/>   | <input type="checkbox"/>             | <input type="checkbox"/>       |
| 11. Alguien ha difundido rumores sobre mí por internet.                                                                           | <input type="checkbox"/> | <input type="checkbox"/> | <input type="checkbox"/>   | <input type="checkbox"/>             | <input type="checkbox"/>       |
| 12. He dicho palabras malsonantes a alguien o le he insultado usando SMS o mensajes en internet.                                  | <input type="checkbox"/> | <input type="checkbox"/> | <input type="checkbox"/>   | <input type="checkbox"/>             | <input type="checkbox"/>       |
| 13. He dicho palabras malsonantes sobre alguien a otras personas en mensajes por internet o por SMS                               | <input type="checkbox"/> | <input type="checkbox"/> | <input type="checkbox"/>   | <input type="checkbox"/>             | <input type="checkbox"/>       |
| 14. He amenazado a alguien a través de SMS o mensajes en internet.                                                                | <input type="checkbox"/> | <input type="checkbox"/> | <input type="checkbox"/>   | <input type="checkbox"/>             | <input type="checkbox"/>       |
| 15. He pirateado la cuenta de correo de alguien y he robado su información personal. (email o red social)                         | <input type="checkbox"/> | <input type="checkbox"/> | <input type="checkbox"/>   | <input type="checkbox"/>             | <input type="checkbox"/>       |
| 16. He pirateado la cuenta de alguien y me he hecho pasar por él/ella. (mensajería instantánea o cuenta en red social)            | <input type="checkbox"/> | <input type="checkbox"/> | <input type="checkbox"/>   | <input type="checkbox"/>             | <input type="checkbox"/>       |
| 17. He creado una cuenta falsa para hacerme pasar por otra persona. (Facebook o MSN)                                              | <input type="checkbox"/> | <input type="checkbox"/> | <input type="checkbox"/>   | <input type="checkbox"/>             | <input type="checkbox"/>       |
| 18. He colgado información personal de alguien en internet.                                                                       | <input type="checkbox"/> | <input type="checkbox"/> | <input type="checkbox"/>   | <input type="checkbox"/>             | <input type="checkbox"/>       |
| 19. He colgado videos o fotos comprometidas de alguien en internet.                                                               | <input type="checkbox"/> | <input type="checkbox"/> | <input type="checkbox"/>   | <input type="checkbox"/>             | <input type="checkbox"/>       |
| 20. He retocado fotos o videos de alguien que estaban colgados en internet.                                                       | <input type="checkbox"/> | <input type="checkbox"/> | <input type="checkbox"/>   | <input type="checkbox"/>             | <input type="checkbox"/>       |
| 21. He excluido o ignorado a alguien en una red social o chat.                                                                    | <input type="checkbox"/> | <input type="checkbox"/> | <input type="checkbox"/>   | <input type="checkbox"/>             | <input type="checkbox"/>       |
| 22. He difundido rumores sobre alguien en internet.                                                                               | <input type="checkbox"/> | <input type="checkbox"/> | <input type="checkbox"/>   | <input type="checkbox"/>             | <input type="checkbox"/>       |
