# Supplementary material
Source: Elsevier journal article supplement (https://www.sciencedirect.com/science/article/pii/S1135755X16000087)
Supplement: mmc2 [file S1135755X16000087:mmc2.pdf]

## BULLYING

EN ESTE APARTADO TE PREGUNTAMOS SOBRE TUS POSIBLES EXPERIENCIAS RELACIONADAS CON BULLYING EN TU ENTORNO (CENTRO ESCOLAR, AMIGOS, CONOCIDOS), COMO VICTIMA Y/O AGRESOR. TUS RESPUESTAS SERÁN CONFIDENCIALES.

¿Has vivido algunas de las siguientes situaciones en los últimos dos meses? (por favor, haz una cruz en la casilla de la respuesta más apropiada para ti)

|                                                                       | No                       | Sí, una o<br>dos veces   | Sí, una o<br>dos veces al<br>mes | Sí,<br>alrededor<br>de una vez<br>a la semana | Sí, más de<br>una vez a la<br>semana |
|-----------------------------------------------------------------------|--------------------------|--------------------------|----------------------------------|-----------------------------------------------|--------------------------------------|
| 1. Alguien me ha golpeado, me ha pateado o me ha empujado.            | <input type="checkbox"/> | <input type="checkbox"/> | <input type="checkbox"/>         | <input type="checkbox"/>                      | <input type="checkbox"/>             |
| 2. Alguien me ha insultado.                                           | <input type="checkbox"/> | <input type="checkbox"/> | <input type="checkbox"/>         | <input type="checkbox"/>                      | <input type="checkbox"/>             |
| 3. Alguien le ha dicho a otras personas palabras malsonantes sobre mí | <input type="checkbox"/> | <input type="checkbox"/> | <input type="checkbox"/>         | <input type="checkbox"/>                      | <input type="checkbox"/>             |
| 4. Alguien me ha amenazado                                            | <input type="checkbox"/> | <input type="checkbox"/> | <input type="checkbox"/>         | <input type="checkbox"/>                      | <input type="checkbox"/>             |
| 5. Alguien me ha robado o roto mis cosas.                             | <input type="checkbox"/> | <input type="checkbox"/> | <input type="checkbox"/>         | <input type="checkbox"/>                      | <input type="checkbox"/>             |
| 6. He sido excluido o ignorado por otras personas.                    | <input type="checkbox"/> | <input type="checkbox"/> | <input type="checkbox"/>         | <input type="checkbox"/>                      | <input type="checkbox"/>             |
| 7. Alguien ha difundido rumores sobre mí.                             | <input type="checkbox"/> | <input type="checkbox"/> | <input type="checkbox"/>         | <input type="checkbox"/>                      | <input type="checkbox"/>             |
| 8. He golpeado, pateado o empujado a alguien                          | <input type="checkbox"/> | <input type="checkbox"/> | <input type="checkbox"/>         | <input type="checkbox"/>                      | <input type="checkbox"/>             |
| 9. He insultado y he dicho palabras malsonantes a alguien             | <input type="checkbox"/> | <input type="checkbox"/> | <input type="checkbox"/>         | <input type="checkbox"/>                      | <input type="checkbox"/>             |
| 10. He dicho a otras personas palabras malsonantes sobre alguien.     | <input type="checkbox"/> | <input type="checkbox"/> | <input type="checkbox"/>         | <input type="checkbox"/>                      | <input type="checkbox"/>             |
| 11. He amenazado a alguien                                            | <input type="checkbox"/> | <input type="checkbox"/> | <input type="checkbox"/>         | <input type="checkbox"/>                      | <input type="checkbox"/>             |
| 12. He robado o estropeado algo de alguien                            | <input type="checkbox"/> | <input type="checkbox"/> | <input type="checkbox"/>         | <input type="checkbox"/>                      | <input type="checkbox"/>             |
| 13. He excluido o ignorado a alguien                                  | <input type="checkbox"/> | <input type="checkbox"/> | <input type="checkbox"/>         | <input type="checkbox"/>                      | <input type="checkbox"/>             |
| 14. He difundido rumores sobre alguien                                | <input type="checkbox"/> | <input type="checkbox"/> | <input type="checkbox"/>         | <input type="checkbox"/>                      | <input type="checkbox"/>             |
